# Supplementary material for: Infant Feeding Choices during the First Post-Natal Months and Anthropometry at Age Seven Years: Follow-Up of a Randomized Clinical Trial
Source: MDPI journal article supplement (doi:10.3390/nu14193900), 2022-09-21
Supplement: s1 [file nutrients-1894576-supplementary.pdf › nutrients-1894576-supplementary.pdf]

**Supplemental Table S1** Comparison of seven-year follow-up participants and non participants, intent-to-treat population.

|                                                  | participants  | non<br>participants | <i>p</i> -value |
|--------------------------------------------------|---------------|---------------------|-----------------|
| Male sex (%)                                     | 54.0          | 43.2                | 0.093           |
| Maternal education Basic/Additional/Tertiary (%) | 1.9/60.9/37.3 | 9.5/53.7/36.8       | 0.019           |
| Mother smoked during pregnancy (%)               | 20.5          | 32.6                | 0.030           |
| Age of mother at delivery (years, mean±SD)       | 31.7±4.8      | 29.7±5.6            | 0.004           |

Continuous variables tested with Student's t-test (Satterthwaite), categorical data tested with Chi-Square test

**Supplemental Table S2.** Anthropometry and body composition at seven years of age follow-up (mean±SD), per protocol population.

|                                          | Formula groups         |                   | IF vs. CF <sup>1</sup> | Estimated difference between IF and CF | Breastfed group<br>(n=36) | IF vs. BF <sup>1</sup> | CF vs. BF <sup>1</sup> |
|------------------------------------------|------------------------|-------------------|------------------------|----------------------------------------|---------------------------|------------------------|------------------------|
|                                          | Intervention<br>(n=32) | Control<br>(n=20) |                        |                                        |                           |                        |                        |
| Weight (kg)                              | 26.7±4.8               | 25.4±3.3          | 0.267                  | 0.99 [-1.57;3.54] <sup>2</sup>         | 26.4±5.2                  | 0.835                  | 0.380                  |
| Weight-for-age (z-score)                 | 0.95±1.06              | 0.68±0.92         | 0.347                  | 0.22 [-0.38;0.82] <sup>2</sup>         | 0.88±1.15                 | 0.813                  | 0.479                  |
| Height (cm)                              | 128.9±5.0              | 128.2±4.1         | 0.597                  | 0.56 [-2.18;3.30] <sup>2</sup>         | 129.0±5.1                 | 0.928                  | 0.534                  |
| Height-for-age (z-score)                 | 1.41±0.93              | 1.30±0.77         | 0.648                  | 0.12 [-0.39;0.63] <sup>2</sup>         | 1.42±0.94                 | 0.951                  | 0.598                  |
| Head circumference (cm)                  | 52.8±1.9               | 52.5±1.6          | 0.512                  | 0.22 [-0.71;1.16] <sup>2</sup>         | 52.7±1.5                  | 0.766                  | 0.653                  |
| BMI (kg/m <sup>2</sup> )                 | 16.0±2.5               | 15.4±1.4          | 0.265                  | 0.46 [-0.74;1.65] <sup>2</sup>         | 15.8±2.7                  | 0.779                  | 0.436                  |
| BMI-for-age (z-score)                    | 0.15±1.28              | -0.14±1.09        | 0.390                  | 0.22 [-0.44;0.88] <sup>2</sup>         | 0.00±1.48                 | 0.671                  | 0.678                  |
| Body fat from BIA (%)                    | 14.9±7.6               | 14.6±5.4          | 0.980                  | 0.35 [-3.67;4.38] <sup>3</sup>         | 12.8±6.9                  | 0.231                  | 0.215                  |
| Triceps (mm)                             | 11.6±4.6               | 10.4±3.5          | 0.314                  | 1.40 [-0.90;3.70] <sup>3</sup>         | 11.2±3.9                  | 0.750                  | 0.428                  |
| Subscapular (mm)                         | 7.4±3.8                | 6.4±1.5           | 0.196                  | 1.05 [-0.76; 2.86] <sup>3</sup>        | 7.6±3.9                   | 0.880                  | 0.133                  |
| Body fat from skinfolds (%) <sup>1</sup> | 17.7±6.0               | 16.0±4.0          | 0.231                  | 1.91 [-1.08;4.90] <sup>3</sup>         | 17.6±5.6                  | 0.936                  | 0.229                  |

Mean ± SD. <sup>1</sup> p-values from Student's t-test (Satterthwaite), significance at  $p < 0.05$  <sup>2</sup> Slaughter et al. 1988 <sup>2</sup> Derived from ANCOVA adjusted for age, maternal age at 7-year-follow-up, sex, smoking mother at 7-year-follow-up, value at age 1 month: : mean [95% CI] <sup>3</sup> Derived from ANCOVA adjusted for age, maternal age at 7-year-follow-up, sex, smoking mother at 7-year-follow up: mean [95% CI]

**Supplemental Table S3.** Absolute change of weight, length and BMI z-scores (mean±SD) at 7 years of life in comparison to month one, month four and four years (IF = interventional formula, CF = control formula, BF = breast fed), intent-to-treat population.

|                                          | <i>n</i> | IF        | <i>n</i> | CF        | IF vs. CF <sup>a</sup> | <i>n</i> | BF         | IF vs. BF <sup>a</sup> | CF cv. BF <sup>a</sup> |
|------------------------------------------|----------|-----------|----------|-----------|------------------------|----------|------------|------------------------|------------------------|
| <b>Change in weight-for-age z-scores</b> |          |           |          |           |                        |          |            |                        |                        |
| 7 years – 1 month                        | 54       | 1.32±1.14 | 50       | 1.15±1.02 | 0.428                  | 57       | 0.87±1.08  | 0.038                  | 0.177                  |
| 7 years – 4 months                       | 54       | 0.72±1.02 | 50       | 0.99±0.88 | 0.149                  | 57       | 0.83±1.08  | 0.591                  | 0.391                  |
| 7 years – 4 years                        | 52       | 0.32±0.69 | 48       | 0.31±0.67 | 0.902                  | 57       | 0.16±0.61  | 0.185                  | 0.232                  |
| <b>Change in height-for-age z-scores</b> |          |           |          |           |                        |          |            |                        |                        |
| 7 years – 1 month                        | 54       | 1.16±1.08 | 50       | 1.09±1.01 | 0.731                  | 57       | 0.69±1.02  | 0.021                  | 0.045                  |
| 7 years – 4 months                       | 54       | 0.80±0.96 | 50       | 1.00±0.82 | 0.264                  | 57       | 0.85±0.82  | 0.771                  | 0.360                  |
| 7 years – 4 years                        | 52       | 0.35±0.57 | 48       | 0.41±0.56 | 0.547                  | 57       | 0.45±0.51  | 0.326                  | 0.747                  |
| <b>Change in BMI-for-age z-scores</b>    |          |           |          |           |                        |          |            |                        |                        |
| 7 years – 1 month                        | 54       | 0.89±1.35 | 50       | 0.70±1.15 | 0.434                  | 57       | 0.57±1.45  | 0.222                  | 0.596                  |
| 7 years – 4 months                       | 54       | 0.32±1.38 | 50       | 0.52±1.16 | 0.437                  | 57       | 0.37±1.32  | 0.836                  | 0.555                  |
| 7 years – 4 years                        | 52       | 0.18±0.94 | 48       | 0.12±1.00 | 0.744                  | 57       | -0.17±0.89 | 0.046                  | 0.120                  |

<sup>a</sup> *p*-values from Student's t-test (Satterthwaite), significance at *p*<0.05
